# Supplementary material for: Leveraging 16S rRNA Microbiome Sequencing Data to Identify Bacterial Signatures for Irritable Bowel Syndrome
Source: Front Cell Infect Microbiol. 2021 Jun 11;11:645951. doi: 10.3389/fcimb.2021.645951 (PMC8231010; doi:10.3389/fcimb.2021.645951)
Supplement: Supplementary file 1 [file DataSheet_1.zip › Supplementary Files/Table-S1.xlsx]

## Sheet: Sheet1
Study	Shannon indice					observed_otus_vector indice					evenness indice
	HC_Mean	HC_SD	IBS_Mean	HC_SD	P	HC_Mean	HC_SD	IBS_Mean	HC_SD	P	HC_Mean	HC_SD	IBS_Mean	HC_SD	P
Zhuang_2018	5.675	0.6	5.831	0.912	0.4507	100.333	47.7402	106.45	53.0823	0.8504	0.866	0.059	0.844	0.059	0.3704
Zhu_2019	4.955	0.927	5.601	0.632	0.0184	109.929	30.856	161.8	26.801	0.0002	0.734	0.106	0.764	0.065	0.407
Presti_2019	2.425	0.218	2.262	0.507	0.1391	5.53125	0.62136	5.14286	1.0789	0.1324	0.985074	0.02228	0.944309	0.186489	0.209
Pozuelo_2015	5.816	0.75	5.381	0.918	0.0001	255.057	66.428	239.604	78.969	0.068	0.731	0.076	0.686	0.091	0.0001
Saulnier_2011	5.197	0.586	5.295	0.503	0.3253	93.136	24.982	96.418	25.292	0.2445	0.801	0.809	0.07	0.061	0.5017
Labus_2017	4.718	0.386	4.471	0.569	0.263	44.364	11.278	37.593	12.855	0.1337	0.867	0.031	0.869	0.049	0.3346
